1 **Inventive nesting behaviour in the keyhole wasp *Pachodynerus nasidens***  
2 **Latreille (Hymenoptera: Vespidae) in Australia, and the risk to aviation safety**

3

4

5 Alan P.N. House<sup>1\*</sup>, Jackson G. Ring<sup>2&</sup> and Philip P. Shaw<sup>3&</sup>

6

7 <sup>1</sup> Eco Logical Australia, 12 Creek St, Brisbane, Queensland, Australia

8 <sup>2</sup> Operations Section, Brisbane Airport Corporation, Brisbane Airport, Queensland,

9 Australia

10 <sup>3</sup> Ecosure Pty Ltd, Burleigh Heads, Queensland, Australia

11

12 \* Corresponding author

13 Email: [alan.house@ecoaus.com.au](mailto:alan.house@ecoaus.com.au)

14

15

16

17 **Abstract**

18 The keyhole wasp (*Pachodynerus nasidens* Latreille 1812), a mud-nesting wasp  
19 native to South and Central America and the Caribbean, is a relatively recent (2010)  
20 arrival in Australia. In its native range it is known to use man-made cavities to  
21 construct nests. A series of serious safety incidents Brisbane Airport related to the  
22 obstruction of vital airspeed measuring pitot probes on aircraft possibly caused by  
23 mud-nesting wasps at prompted an assessment of risk. An experiment was designed  
24 to determine the species responsible, the types of aircraft most affected, the  
25 seasonal pattern of potential risk and the spatial distribution of risk on the airport. A  
26 series of replica pitot probes were constructed using 3D-printing technology,  
27 representing aircraft with high numbers of movements (landings and take-offs), and  
28 mounted at four locations at the airport. Probes were monitored for 39 months.  
29 Probes blocked by mud nesting wasps were retrieved and incubated in mesh bags.  
30 Emerging wasps were identified to species. Results show that all nests in probes  
31 were made by *P. nasidens*, and peak nesting occurs in the summer months. Nesting  
32 success (as proportion of nests with live adult emergents) was optimal between 24  
33 and 31°C and that probes with apertures of more than 3 mm diameter are preferred.  
34 Not all areas on the airport are affected equally, with the majority of nests  
35 constructed in one area. The proportion of grassed areas within 1000 m of probes  
36 was a significant predictor of nesting, and probe volume may determine the sex of  
37 emerging wasps.

38

## 39 Introduction

40 Interactions between aircraft and wildlife are frequent and can have serious financial  
41 and safety consequences. Birds are the most common threat to aircraft [1, 2], with a  
42 host of terrestrial animals also implicated [3]. There were over 16,500 reported  
43 incidents involving birds and a further 397 involving other vertebrates at Australian  
44 airfields between 2008 and 2017 [4]. The majority of these incidents occurred during  
45 take-off (23.45%) or landing (34.24%), the two most vulnerable phases of flight.  
46 However, the risk posed by wildlife when aircraft are on the ground is much less  
47 understood and despite widespread anecdotal knowledge amongst the tropical and  
48 sub-tropical aviation community about insects and flight safety, specific threats posed  
49 by insects have not been quantified before. Here we report on an emerging insect-  
50 aircraft interaction that is a potentially lethal threat to flight safety.

51 In 2012, an exotic mud-nesting wasp (the keyhole wasp, *Pachodynerus nasidens*  
52 Latreille (Vespidae: Eumeninae)) was detected at Brisbane Airport (caught in an  
53 office off the international arrivals hall: Ross Wylie pers. comm.). This was the  
54 second record of the species in Australia after one was detected in northern Brisbane  
55 during a routine quarantine inspection of cargo initially received at the Port of  
56 Brisbane in 2010. *Pachodynerus nasidens* is native to tropical Central and South  
57 America and the Caribbean, and is also found in the southern USA (Florida, Texas  
58 and Arizona where it is possibly adventive [5, 6]. It has also been recorded from a  
59 number of Pacific islands including Hawaii, Polynesia, Micronesia and Japan [7, 8].  
60 *Pachodynerus nasidens* is well known as an inquiline species, using abandoned or  
61 empty nests of other wasps, and for using man-made cavities (e.g. window crevices,  
62 keyholes, electrical sockets), to the extent that wholly constructed nests by the

63 species are rare [9]. Indeed, it is known in USA as the “keyhole wasp”. It will also  
64 nest in the ground and construct mud nests attached to plants: this plasticity in  
65 nesting behaviour is remarkable [5] and allows the species to adapt to new  
66 opportunities for nesting in novel environments. It is a relatively small wasp,  
67 distinguished from other species in the genus by the relatively short thorax and dull  
68 yellow-brown markings (as opposed to bright yellow) on distal abdominal tergites  
69 [10].

70 In its native range it is found in grasslands and swamps dominated by grasses and  
71 sedges [11]. It is found at similar latitudes in South America (e.g. Guarapuava, Brazil)  
72 as in Brisbane, from high altitudes (1120 m) in climates with cool wet seasons and  
73 frosts to sea level [11].

#### 74 ***The risk to flight safety***

75 Airspeed is a critically important measure in aviation. Without an accurate measure of  
76 airspeed pilots cannot easily judge take-off and landing and cannot ensure that the  
77 aircraft flies in a safe speed range; fast enough to generate lift and remain airborne  
78 but also slow enough to avoid structural failure under excess aerodynamic loads.

79 Pitot probes are hollow tube-like instruments that are commonly mounted on the  
80 fuselage behind the nose cone and below to the cockpit. The probes measure  
81 airspeed by subtracting mechanically the ambient “static pressure”, sampled by a  
82 separate sheltered hollow static port, from the “total pressure” of air entering the  
83 exposed pitot probe to give a “dynamic pressure”. Dynamic pressure directly equates  
84 to speed through the air.

85 Aircraft manufacturers and aviation authorities recognise that amongst the issues  
86 that might cause the pitot static system to fail to indicate correct airspeed, a blockage

87 (or even partial blockage) of a pitot probe or static port by insects (or other agents  
88 such as ice) is a significant hazard [12, 13, 14, 15, 16, 17,18]. Anomalies between  
89 separate airspeed indicators can lead to costly and hazardous rejected take-offs or  
90 turn backs [e.g. 15, 16] or even catastrophic consequences [12, 13, 17, 18]. In  
91 February 1996 a Boeing 757 crashed shortly after take-off from the Dominican  
92 Republic, killing all 189 passengers and crew. Anomalous airspeed readings from the  
93 pitot probes were responsible for the pilots misjudging the aircraft's speed. A sphecid  
94 (mud-dauber) wasp was believed to have made a nest in one of the pitot probes,  
95 although none were recovered [19]. The plane had been standing at Gregorio  
96 Luperón International Airport in Puerto Plata, and for the two days prior to the fateful  
97 flight the pitot probes were not covered as recommended by the manufacturer [13].  
98 At Brisbane Airport, five incidents were reported between January and March 2006 in  
99 which pitot probes gave inconsistent readings and flights were either rejected on  
100 take-off or proceeded to their destination. All aircraft were Airbus A330s. An incident  
101 on 19 March 2006 led to dangerous brake heating and tyre deflation when take-off  
102 was rejected, resulting in the deployment of airport rescue and fire-fighting services  
103 [15]. On inspection, it was found that the pitot probe on the pilot-in-command's side  
104 had "wasp-related debris". Material retrieved from this probe by the Australian  
105 Museum included fragments of an insect body including the head of a wasp.  
106 In November 2013, an A330 prepared to take off but returned to the bay after  
107 airspeed discrepancies between the captain's and first officer's readings. After  
108 checking electronic instrumentation the plane was cleared for a second take-off, but  
109 another airspeed discrepancy occurred, and the captain returned under emergency  
110 procedures. Sand and mud consistent with a mud dauber wasp nest was found to be  
111 blocking the captain's probe [16]. Since this incident, more detailed records of wasp-

112 related issues have been recorded at Brisbane and a total of 26 were reported  
113 between November 2013 and April 2019.

114 Partial completion of a nest in a pitot probe can take place very quickly. An A320 was  
115 found to have a blocked total air temperature probe on arrival in Newcastle from  
116 Brisbane in August 2015. The aircraft had been on the ground in Brisbane for only 30  
117 minutes.

118 This paper reports on an experimental approach at Brisbane Airport to determine  
119 which species are implicated in pitot probe blockages, which aircraft are being  
120 targeted, and where on the airport the greatest risk of blockage occurs. Data on  
121 nesting preferences, seasonality, reproductive success will be essential in directing  
122 management to reduce the risks posed by this issue to airlines and the flying public.

123

## 124 **Materials and methods**

### 125 ***Study site***

126 Brisbane is located on the eastern seaboard of Australia (27.3911°S, 153.1197°E),  
127 on the shores of Moreton Bay, Queensland at approximately 4 m above sea level. It  
128 is flanked on the east by the Brisbane River, and on the west by ecologically  
129 significant coastal wetlands (mangroves and saltmarshes) and to the south by the  
130 city of Brisbane. The climate is sub-tropical, with a long-term mean annual rainfall of  
131 1190 mm, 50% of which falls between December and March. The annual mean  
132 maximum temperature is 25.4°C, and annual mean minimum is 15.7°C, with fewer  
133 than 2 frost days per year [20].

134 **Probe deployment**

135 Replica pitot probes were installed at Brisbane Airport between February 2016 and  
136 April 2019. Pitot probes vary in design between each airframe type, so aircraft  
137 movement data (frequency of arrivals and departures) from 2015 at Brisbane Airport  
138 and aircraft location (which terminals and gates aircraft used) were used to determine  
139 which airframes should be included in the study. Airframes were also filtered for pitot  
140 probe dimensions, so that a range of aperture diameters and chamber depths (i.e.  
141 distance to first baffle) were used. Six airframes/pitot probe types were selected  
142 (Table 1).

143 **Table 1. Dimensions of pitot probes for six airframes types and deployment locations**  
144 **at Brisbane Airport. QLINK, QantasLink apron; DTBN, Domestic Terminal**  
145 **North; DTBS, Domestic Terminal South; ITB, International Terminal (see Fig.**  
146 **1).**

| Airframe            | Aperture diameter (mm) | Distance to first baffle (mm) | Volume (mm <sup>3</sup> ) | Tip form | Locations              |
|---------------------|------------------------|-------------------------------|---------------------------|----------|------------------------|
| Embraer ERJ90       | 2.5                    | 29.0                          | 570                       | Concave  | QLINK, DTBN, DTBS      |
| De Havilland Dash 8 | 4.0                    | 19.0                          | 239                       | Concave  | QLINK, DTBN, DTBS      |
| Boeing 737-800      | 5.0                    | 62.0                          | 1218                      | Concave  | QLINK, DTBN, DTBS, ITB |
| Airbus A330         | 5.5                    | 33.0                          | 784                       | Concave  | QLINK, DTBN, DTBS, ITB |
| Boeing 737-         | 7.2 (9/32")            | 33.0                          | 1344                      | Convex   | QLINK, ITB             |

|                |           |      |      |        |                        |  |
|----------------|-----------|------|------|--------|------------------------|--|
| 400            |           |      |      |        |                        |  |
| Boeing 747-400 | 8 (5/16") | 36.0 | 1810 | Convex | QLINK, DTBN, DTBS, ITB |  |

147

148 As sufficient decommissioned pitot probes were difficult to source, we manufactured  
149 probes from UV-resistant ABS plastic using 3-D printing technology, based on  
150 detailed engineering designs for accuracy. Probes were mounted on 3 mm x 900 mm  
151 x 1200 mm white-painted steel sheets (to simulate an aircraft fuselage) which were  
152 themselves attached to a weldmesh panel for rigidity (Fig. 2). Panels were secured to  
153 structures as close as possible to aircraft parking locations (e.g. gate light poles at  
154 the domestic terminal, aerobridges at the international terminal; Fig. 2) with  
155 packaging straps and heavy duty stretch straps and flagged for visibility. They were  
156 erected at heights similar to the aircraft-mounted probes (2-2.5 m at the domestic  
157 terminal for e.g. A320, 4 m at the international terminal for e.g. 747-400 aircraft) (Fig.  
158 2).

159 **Figure 1. Location of pitot probe panels at Brisbane Airport.**

160 **Figure 2. Pitot panels installed on gate light pole at Domestic Terminal (left)**  
161 **and on aerobridge at International Terminal (right).**

162

163 Three panels were established at each of four locations at Brisbane Airport (Fig. 2)  
164 where incidents involving potential mud wasp activity was suspected or where wasps  
165 had been recorded as potentially threatening aircraft: the northern domestic terminal  
166 (QLINK and DTBN), southern domestic terminal (DTBS) and the international  
167 terminal (ITB). The minimum distance between groups of three panels was 233 m.



168 ***Intercept traps***

169 In addition to the mounted replica probes at the gates, a series of intercept traps  
170 were established in November 2018 in both airside (16 traps) and landside (11 traps)  
171 locations. These were included to determine if nesting in pitot probes could be  
172 reduced by attracting females to alternative nest sites away from stationary aircraft.  
173 Each trap consisted of 68 cardboard tubes 8 mm in diameter and 153 mm long, with  
174 one open end. Blocked tubes were removed and replaced by clean ones at weekly  
175 intervals.

176

177 ***Monitoring***

178 Probes were inspected weekly to monthly, depending on season and wasp activity.  
179 Blocked probes were removed from the panels and placed in fine mesh bags with  
180 labels recording date, probe type and location. Bags were kept in a mildly air-  
181 conditioned room (25-27°C) and monitored for emergence. Emerging invertebrates  
182 were placed in vials with methanol, and the date, species, number of individuals and  
183 sex were recorded. Species that could not be identified were sent to the Queensland  
184 Museum for determination. Retrieved probes that remained blocked after 70 days  
185 were opened to determine if there were unhatched wasps in front and/or rear cells.  
186 Probes that did not result in successful emergence were examined for remains of  
187 undeveloped wasps and unconsumed prey.

188 ***Data analysis***

189 We analysed the wasps' probe choice, blockage rates, locations and the relationship  
190 between nesting and environment. As we did not have a perfectly balanced design  
191 (in respect of numbers of probes of each airframe), probe blockage rates were

192 expressed as blockages per 12 probes for analyses of probe choice. Chi-squared  
193 and Fisher exact tests (for small samples) were performed on blockage rates from  
194 pitot probe types and airport locations, and ANOVA on blockage rates and pitot  
195 probe diameter and volume.

196 Broad habitat types that wasps might respond to and be influenced by in terms of  
197 resource availability (i.e. water and sediment for nest building, vegetation for  
198 Lepidopteran prey) were mapped around each pitot panel location using Nearmaps®  
199 satellite imagery from May 2016. Habitats were mapped into the classes in Table 2,  
200 and the areas of each habitat class calculated for 20 m, 50 m, 100 m, 200 m, 500 m  
201 and 1000 m radii around each panel in ArcGIS. Multiple regression analyses were  
202 used to investigate relationships between nesting and environment.

203 **Table 2. Broad habitat types mapped at Brisbane Airport.**

| Habitat            | Description                                                        | Value to wasps                                       | Location on airport |
|--------------------|--------------------------------------------------------------------|------------------------------------------------------|---------------------|
| Natural horizontal | Predominantly grassed areas e.g. around runways, taxiways, aprons  | Source of prey items; water and sediment for nesting | Airside, landside   |
| Natural vertical   | Treed areas e.g. <i>Casuarina</i> plantations                      | Source of prey items; water and sediment for nesting | Landside            |
| Mixed natural      | Tree/shrub/ground cover mixtures e.g. garden areas around landside | Source of prey items; water and sediment for nesting | Landside            |

|                  |                                                                                                             |                                 |                   |
|------------------|-------------------------------------------------------------------------------------------------------------|---------------------------------|-------------------|
|                  | infrastructure                                                                                              |                                 |                   |
| Built horizontal | Bitumen or<br>concreted areas e.g.<br>runways, taxiways,<br>major roads<br>(includes<br>construction sites) | Sediment and water<br>for nests | Airside, landside |

204

## 205 **Results**

### 206 ***Seasonality of pitot blockages***

207 The first pitot probe blockages occurred two weeks after the probe panels were  
208 installed. In total, 93 instances of fully blocked probes were recorded during the 39-  
209 month study. There is a seasonal pattern, with 96% of nesting occurring between  
210 November and May (Fig. 3). Data from 2017 indicate that nesting of *P. nasidens*  
211 extended into July, with hatching as late as August. Nesting has been recorded in  
212 every month of the year except July and September. There is no relationship  
213 between nesting and rainfall ( $F_{1,37} = 0.0001$ ,  $p = 0.99$ ), or with rainfall in the previous  
214 3 months ( $F_{1,37} = 0.837$ ,  $p = 0.37$ ). However, nesting was significantly correlated with  
215 the average monthly temperature ( $F_{1,37} = 7.33$ ,  $p = 0.01$ ).

216 **Figure 3. Pitot probe blockages by mud-nesting wasps and rainfall at Brisbane**  
217 **Airport, February 2016 – April 2019.**

218

219 ***Probe types blocked***

220 The blockage rate by aircraft type indicate that probes with apertures  $\geq 2.5$  mm are  
221 preferred (Table 3). Proportionally, probes from 737 airframes (737-400 and 737-800,  
222 diameters 5-7.2 mm) are most likely to be blocked (56.3% of all blockages),  
223 especially the 400 series, followed by the A330 (19.3%, diameter 5.5 mm). The  
224 smallest probe (Embraer ERJ90, diameter 2.5 mm) had the lowest rate of blockage.  
225 Although the standardised rates of pitot probe blockage were significantly different  
226 from an even distribution ( $\chi^2 = 28.08$ ,  $P < 0.01$ ), neither probe aperture diameter nor  
227 distance to first baffle were significant predictors of nest choice ( $F_{2,57} = 0.909$ ,  $P >$   
228 0.05).

229 **Table 3. Pitot blockages by aircraft type, February 2016-April 2019 at Brisbane Airport.**

| <b>Airframe type</b> | <b>Standardised rate of blockages (per 12 probes)</b> | <b>Probe aperture diameter (mm)</b> |
|----------------------|-------------------------------------------------------|-------------------------------------|
| ERJ90                | 1.3                                                   | 2.5                                 |
| DHC-8                | 14.6                                                  | 4.0                                 |
| B737-800             | 23                                                    | 5.0                                 |
| A330                 | 23                                                    | 5.5                                 |
| B737-400             | 44                                                    | 7.2                                 |
| B747-400             | 13                                                    | 8                                   |

230

231 An ANOVA on blockages showed that there were no significant differences in rates  
232 of nesting between probe types ( $F_{5,54} = 1.411$ ,  $P > 0.05$ ), even though 86% occurred  
233 in probes with a diameter range of 5-8 mm.

234 ***Location on airport***

235 Of the 93 blockages, 93.5% were detected at the QLINK apron: this results in a  
236 highly significant deviation from expected ratios ( $\chi^2 = 91.59$ ,  $p = \ll 0.01$ ), with no  
237 significant differences between other locations in pair-wise tests.

238 In addition to this data on nesting in pitot probes, *P. nasidens* was recorded nesting  
239 in a number of other locations around the airport including on-ground servicing  
240 equipment, and in timber trap nests that were separately deployed to trap wasps.

241 ***Habitat distributions***

242 Probes closer to natural habitats are more likely to be blocked than those further  
243 away (Fig. 4). Linear regression between the number of blockages and the minimum  
244 distance of panels to each habitat type shows that the proximity to natural horizontal  
245 habitat is significant ( $R = -0.73$ ,  $P < 0.01$ ) but proximity to natural vertical habitat is  
246 not ( $R = -0.025$ ,  $p > 0.05$ ) (Fig. 4). A multiple regression of the number of probe  
247 blockages and the proportion of habitat types at increasing distance shows that the  
248 amount of natural horizontal habitat at 1000 m is also significant (Table 4).

249 **Figure 4. Relationship between pitot probe blockages and minimum distance to**  
250 **(a) natural horizontal habitat and (b) natural vertical habitat.**

251

252 **Table 4. Multiple regression analysis of proportions of each broad habitat type at increasing distance from probe panels and rate of**  
 253 **probe blockage. P values in bold indicate positive significant relationship; P values in italics indicate significant negative**  
 254 **relationship.**

| ANOVA        |       |              | Habitat            |              |                  |       |               |              |                  |              |                |              |        |       |
|--------------|-------|--------------|--------------------|--------------|------------------|-------|---------------|--------------|------------------|--------------|----------------|--------------|--------|-------|
|              |       |              | natural horizontal |              | natural vertical |       | mixed natural |              | built horizontal |              | built vertical |              | water  |       |
| Distance (m) | F     | P            | t                  | P            | t                | P     | t             | P            | t                | P            | t              | P            | t      | P     |
| 20           | 2.343 | 0.157        | -                  | -            | -                | -     | -             | -            | -1.531           | 0.157        | -              | -            | -      | -     |
| 50           | 4.849 | <b>0.037</b> | -                  | -            | -                | -     | -             | -            | -1.345           | 0.211        | -2.809         | <i>0.020</i> | -      | -     |
| 100          | 2.913 | 0.101        | 0.122              | 0.913        | -                | -     | -             | -            | 0.091            | 0.930        | 0.074          | 0.943        | -      | -     |
| 200          | 7.782 | <b>0.010</b> | -2.166             | 0.067        | -                | -     | -3.340        | <i>0.012</i> | -2.610           | <i>0.035</i> | -2.836         | <i>0.025</i> | -      | -     |
| 500          | 2.402 | 0.177        | 1.425              | 0.214        | 1.429            | 0.212 | 1.399         | 0.221        | 1.423            | 0.214        | 1.401          | 0.220        | 0.921  | 0.399 |
| 1000         | 5.399 | <b>0.032</b> | 2.461              | <b>0.049</b> | 2.305            | 0.061 | -1.637        | 0.153        | 2.229            | 0.067        | 2.191          | 0.071        | -0.887 | 0.395 |

255 ***Nesting success***

256 There were 93 occurrences of blocked pitot probes. Of these, 37 (39.8%) produced  
257 live adult wasps, 18 (19.4%) had developed but unhatched wasp imagos, and 38  
258 (40.9%) had contents that were either undeveloped or parasitised. All adult mud-  
259 nesting wasps that emerged from pitot probes were *P. nasidens*.

260 There is no consistent trend in successful nesting (i.e. completed nests and live  
261 hatching) with time of year (Fig. 5), and no significant relationship between hatching  
262 and rainfall during nesting ( $F_{1,37} = 0.010$ ,  $P \gg 0.05$ ): however, rainfall during the  
263 previous 3 months and nesting success was positively related ( $F_{1,37} = 7.998$ ,  $p <$   
264  $0.01$ ). Similarly, mean maximum temperature during nest development and ultimate  
265 nesting success were not related ( $F_{1,37} = 0.409$ ,  $p > 0.05$ ). Probes blocked during the  
266 peak of summer temperatures and rainfall (January-March: mean max. temp. over 3  
267 years  $29.6^{\circ}\text{C}$ ) had lower success rates, nests completed late in the nesting season  
268 (April-June: mean max. temp.  $24.1^{\circ}\text{C}$ ) had a greater likelihood of successful  
269 emergence and probes blocked after mid-May-October (mean max. temp.  $23.4^{\circ}\text{C}$ )  
270 developed to the adult stage but did not hatch.

271 **Figure 5. Mean number of days (from collection of probes) to emergence of live**  
272 **wasps, February 2016 – April 2019.**

273

274 Incubation times varied greatly, from 16 to 138 days with an average of 45. In the  
275 2016-17 and 2017-18 summer nesting periods, nests that were completed at the start  
276 and the end of these periods appear to mature more quickly (Fig. 5).

277 Blocked probes have had 1-3 cells built, but only two (both A330), have produced  
278 two adults, and one produced three (B737-800). There was no significant difference

279 in probe types in the number of cells yielding more than one adult wasp ( $\chi^2 = 5.64$ , p  
280 = 0.130).

281 Probes that did not result in successful hatching were examined for remains of  
282 undeveloped wasps and unconsumed prey. All had either pre-adult *P. nasidens*  
283 pupae or had evidence of caterpillar and/or beetle larvae: none had evidence of other  
284 native wasps or spiders (which would indicate other genera of Vespidae).

285 Only one probe produced live adults of a potential parasitoid of *P. nasidens*: five  
286 *Chrysis lincea* (Chrysididae) adults hatched from a B737-400 probe retrieved in May  
287 2017.

### 288 **Sex ratios**

289 A male-biased sex ratio of 1.53:1 was recorded from the pitot probes: this does not  
290 significantly deviate from a 1:1 relationship (Pearson  $\chi^2 = 2.233$ , p = 0.693). Males  
291 and females were equally likely to hatch from A330 and 747-800 probes (observed  
292 ratio 1:1), but males were 3 and 1.75 times more likely to hatch from 737-800 and  
293 737-400 probes respectively. There is also a close curvilinear relationship ( $r^2 =$   
294 0.942) between the proportion of hatching males and pitot probe volume with the  
295 greatest proportion hatching from mid-sized probes, but this relationship is not as  
296 close for females ( $r^2 = 0.517$ ) (Fig. 6).

297 **Figure 6. Relationship between pitot probe volume and sex of emerging live**  
298 **adult wasps. Second order polynomial line of best fit fitted.  $r^2_{\text{male}} = 0.942$  (p <**  
299 **0.05),  $r^2_{\text{female}} = 0.517$  (ns).**



## 300 Discussion

301 Nesting by *P. nasidens* at Brisbane Airport follows general seasonal patterns found  
302 within its native range [21], with peak nesting occurring in warmer, wetter months  
303 although the only significant relationship was to temperature. Nesting success (as  
304 expressed by the proportion of nests producing live adults) is very consistent with  
305 other studies of this species (39.8% compared with 39.7% in [21], and incubation  
306 times are also generally within ranges published for native populations (16-138 days  
307 compared with 23-41 days [22], 5-59 days [21], 20-24 days [23].

308 Nesting activity is mostly confined to the summer months, which broadly agrees with  
309 other studies [21, 23], where egg development was optimal between 26-31°C. At  
310 Brisbane, nests completed after the peak of summer (when mean maximum  
311 temperatures fell below 26°C) still developed and hatched adults, suggesting some  
312 local climatic adaptation to slightly lower temperatures.

313 Sex ratios of *P. nasidens* emerging from trap nests within its native range are  
314 variable, from 2:1 male to female (from a very small sample size) [11], 1:1 [24], and  
315 0.56:1 [21]. Evidence suggests that local conditions of weather, prey availability and  
316 nest opportunities can affect sex ratios in cavity-nesting species [25, 26]. Data from  
317 this study suggests that there may be an effect of pitot probe nest volume on the  
318 proportion of males successfully hatching, but not the number of females.

319 The emergence of *Chrysis lincea* from blocked pitot probes indicates that some  
320 parasitism of *P. nasidens* is occurring, and the presence of *Melittobia* sp., *Cotesia* sp.  
321 and *Perilampus* sp. from mud nests on adjacent terminal buildings suggests that  
322 these parasitoids may also contribute to control of *P. nasidens*. A *Melittobia* species  
323 parasitised *P. nasidens* in Cuba, affecting between 41.6 and 75% of all cells [27].

324 The occurrence of *P. nasidens* at Brisbane Airport and the high number of pitot  
325 incidents there due to mud wasps indicates that this species is primarily responsible,  
326 but other species cannot be excluded. The earliest recorded aircraft incident in 2006,  
327 if attributable to this species, indicates that it may have arrived some time before the  
328 first official record in north Brisbane 2010 and at Brisbane Airport in 2012. Other mud  
329 nesting wasp species known to be present at the airport include (from observation  
330 and live captures) include *Abispa ephippium*, *Anterhynchium nigricinctum*, *Delta*  
331 *campaniforme*, *Delta* sp. aff. *nigricornis*, *Delta* sp. (Vespidae: Eumeninae), *Chalybion*  
332 sp. aff. *bengalense*, *Sceliphron formosum* (Sphecidae: Sceliphrinae), *Pison*  
333 *pyrrhicum*, *Pison* sp. (Crabronidae: Crabroninae).

334 The choice of pitot probe type for nesting in *P. nasidens* appears to be based on a  
335 minimum aperture of 2.5-3 mm. Adult females are 10-12 mm long, and observations  
336 of active nesting in probes showed that wasps leave head-first, indicating that they  
337 turn around inside the probe. A smaller aperture may be enough to allow a pupa to  
338 develop and hatch, but adult females cannot physically negotiate the narrow bore. In  
339 Brazil, *P. nasidens* was found to prefer apertures of 6-9 mm and did not use traps  
340 with apertures of 4 mm which were also available [11]. [21] found *P. nasidens* and its  
341 congeners did not nest in cavities with apertures above 7 mm in diameter. However,  
342 *P. nasidens* has been found nesting in bamboo canes between 17 and 23 mm in  
343 diameter [28]. Of the other mud wasps at Brisbane Airport (above), only *Pison*  
344 *pyrrhicum* is likely to be small enough (7.4-7.7 mm long) to negotiate the pitot probes.  
345 Females of the other species are 18 mm (*Chalybion bengalense*) to 30 mm (*Abispa*  
346 *ephippium*) in length.

347 The environment available at Brisbane Airport to *P. nasidens* for securing nesting  
348 resources is entirely modified. All grassed areas are managed (i.e. mown) to reduce

349 their attraction to birds; plantings of native species in plantations and gardens are  
350 similarly semi-natural at best. The closest environments to the pitot probe panels are  
351 highly modified structures that provide few nesting resources (prey, sediment and  
352 water), except for pitot probes. There is evidence that the extent of grassy habitats at  
353 1000 m from the panels may influence nesting success: this shows that wasps are  
354 prepared to use the pitot probes despite making longer flights to gather nest building  
355 resources.

356 Nesting in this species is extremely efficient at Brisbane Airport. Time to complete a  
357 two-cell nest may be as short as a few hours: anecdotal evidence suggests that a  
358 complete nest can be constructed in a pitot probe within 5 hours – this occurred at  
359 night between arrival at 20:41 and 05:49 on 1 March 2014 (Boeing 737). In its native  
360 range (i.e. Jamaica) the total time to complete a cell is between 2.5 and 4.75 hrs,  
361 with a 3-cell nest in a 6 mm diameter cavity completed in 3.5 hrs [23]. As most nests  
362 in pitot probes at Brisbane are only single-celled, nest-building is considerably more  
363 rapid and may be limited to provisioning a single cell and applying a closing plug of  
364 mud. In respect of dangers to aircraft however, the nest does not need to be  
365 complete: the first addition of mud for the rearmost cell wall (if required) or  
366 introduction of the first prey item is enough to cause anomalous airspeed readings as  
367 air flow in the pitot probe is impeded. Wasps have been observed inspecting aircraft  
368 noses within a few minutes of arrival at the gate, suggesting some experiential  
369 learning and memory of the nesting resource: the mobile and transient nature of the  
370 probes on aircraft (i.e. planes come and go) makes this choice of real pitot probes for  
371 nesting even more remarkable.

372 *P. nasidens* is native to tropical South America, extending to the southern USA  
373 (Florida, Texas and Arizona), including islands in the Caribbean region, although it is

374 possibly adventive in the USA [5]. It has been recorded from a number of Pacific  
375 islands including Hawaii and Micronesia. The spread of *P. nasidens* across the  
376 Pacific region does not follow a precise chronology [7] (recorded dates mark when  
377 the species was first observed) but does indicate that the species has been well-  
378 established outside its natural range since at least 1912. This dispersal is likely to  
379 have been through shipping, although the possibility that wasps are carried on  
380 aircraft cannot be discounted, especially as much of the spread is post WW2 when  
381 air traffic began to increase in the region: aircraft luggage bay temperatures may be  
382 sufficiently high (7°C to over 25°C: [29]) to allow adult wasps or pupae in nests to  
383 survive, and even wheel-wells may be suitable for shorter and lower altitude flights  
384 [30]. The appearance of *P. nasidens* in Hawaii as early as 1912 confirms that it  
385 arrived there by boat, as the first crossing of the Pacific to Hawaii (O'ahu) by  
386 aeroplane from the west coast of USA did not take place until 1927. The progression  
387 of the species across the Pacific is not a neat progression over time from east to  
388 west: this may reflect the opportunistic nature of dispersal, or simply the pattern of  
389 investigation of island invertebrate faunas by entomologists, or both.

390 As an adaptable, inventive and highly mobile species outside of its natural range, *P.*  
391 *nasidens* has the potential to spread from Brisbane to other locations in Australia  
392 where climates are suitable. Having arrived in Australia, the species has established  
393 in a challenging environment but one that provides all the basic requirements for  
394 population persistence and has identified a potential nesting opportunity that is both  
395 transient and mobile. In doing so, *P. nasidens* poses a significant risk to aviation  
396 safety, and further work is warranted to determine the prospects for its control or,  
397 preferably, eradication.

398

399 **Acknowledgements**

400 We would like to thank Qantas (Matt Hill and Brian Ford) for their support of this  
401 project and their assistance with manufacturing the probes and panels. Matt has also  
402 been an extremely enthusiastic champion of the work and provided critical  
403 information on pitot probes and aviation operations. Dave Selby and Peter Dunlop  
404 (Brisbane Airport Corporation) were early supporters of this work, and Ross Wylie  
405 (Biosecurity Queensland) gave useful advice on wasp ecology. Chris Burwell  
406 (Queensland Museum) provided wasp identifications, and Jeff McKee, Susan House  
407 and Carissa Free provided helpful comments on an earlier manuscript.

408

## 409 **References**

- 410 1. DeVault T, Blackwell BF, Seamans TW, Begier MJ, Kouger JD,  
411 Washburn JE, Miller PR, Dolbeer RA. Estimating interspecific economic  
412 risk of bird strikes with aircraft. *Wildl Soc Bull.* 2018; 42: 94-101.
- 413 2. Marra PP, Dove CJ, Dolbeer R, Dahlan NF, Heacker M, Whatton JF, et al.  
414 Migratory Canada geese cause crash of US Airways Flight 1549. *Front*  
415 *Ecol Environ.* 2009; 7: 297-301.
- 416 3. Schwarz KB, Belant JL, Martin JA, DeVault TL, Wang G. Behavioral traits  
417 and airport type affect mammal incidents with U.S. civil aircraft. *Environ*  
418 *Manage.* 2014; 54: 908-18.
- 419 4. Australian Transport Safety Bureau. Airspeed indication failure on take-off  
420 involving Airbus A330, 9M-MTK, Brisbane Airport, Queensland, on 18 July  
421 2018. Australian Transport Safety Bureau, Canberra; 2018.
- 422 5. Carpenter JM. The genus *Pachodynerus* in North America (Hymenoptera:  
423 Vespidae: Eumeninae). *Proc Entomol Soc Wash.* 1986; 88: 572-77.
- 424 6. Global Biodiversity Information Facility. Global Biodiversity Information  
425 Facility search for *Pachodynerus nasidens*; 2019. [cited 27 May 2019].  
426 GBIF Occurrence Download. Available from:  
427 <https://doi.org/10.15468/dl.f65ys6>.
- 428 7. Yamane S, Gusenleitner J, Menke AS. *Pachodynerus nasidens* (Latreille)  
429 (Hymenoptera, Vespidae), an adventive potter wasp new to Japan. *Spec*  
430 *Divers.* 1996; 1: 93-7.
- 431 8. Barrera-Medina R. Notas sobre el género *Pachodynerus* Saussure, 1870  
432 (Hymenoptera: Vespidae: Eumeninae) en Chile. *Bol Biodivers Chile* 2010;  
433 4: 94-8.

- 434 9. Freeman B, Jayasingh D. Population dynamics of *Pachodynerus nasidens*  
435 (Hymenoptera) in Jamaica. *Oikos*. 1975; 26: 86-91.
- 436 10. Bequaert JC. The genus *Pachodynerus* (Hymenoptera, Vespidae) in the  
437 Antilles. *Psyche*. 1948; 55, 105-12.
- 438 11. Buschini M, Buss C. Biologic aspects of different species of *Pachodynerus*  
439 (Hymenoptera; Vespidae; Eumeninae). *Braz J Biol*. 2010; 70: 623-29.
- 440 12. Bureau d'Enquêtes et d'Analyses pour la sécurité de l'aviation civile  
441 (BEA). Final Report On the accident on 1<sup>st</sup> June 2009 to the Airbus A330-  
442 203 registered F-GZCP operated by Air France flight AF 447 Rio de  
443 Janeiro – Paris. Bureau d'Enquêtes et d'Analyses pour la sécurité de  
444 l'aviation civile. Le Bourget, France; 2012.
- 445 13. Boeing. Erroneous: flight instrument information – safety and guidance.  
446 *Aero* (Boeing). 2003; 29.
- 447 14. Civil Aviation Safety Authority. Wasp infestation – Alert: Civil Aviation  
448 Safety Authority Canberra; 2018. Airworthiness Bulletin AWB 02-052 Issue  
449 4-3 May 2018.
- 450 15. Australian Transport Safety Bureau. Rejected takeoff – Brisbane Airport,  
451 Qld – 19 March 2006 – VN-QPB, Airbus A330-303: Australian Transport  
452 Safety Bureau, Canberra; 2008. Report no. 200601453.
- 453 16. Australian Transport Safety Bureau 2016. Air data system failure involving  
454 Airbus A330-243, A6-EYJ, near Brisbane Airport, Qld on 21 November  
455 2013: Australian Transport Safety Bureau, Canberra; 2016. Aviation  
456 Occurrence Investigation AO-2013-212.

- 457 17. Australian Transport Safety Bureau. Australian aviation wildlife strike  
458 statistics 2008–2017. Australian Transport Safety Bureau, Canberra;  
459 2018.
- 460 18. National Transportation Safety Bureau. Aircraft Accident Report. Florida  
461 Commuter Airlines Inc. Douglas DC-3, N75KW Grand Bahama Island,  
462 Bahamas September 12, 1980: National Transportation Safety Board,  
463 Washington DC; 1981.
- 464 19. Junta Investigadora de Accidentes Aéreos. Final Aviation Accident report:  
465 Birgenair Flight ALW-301. Junta Investigadora de Accidentes Aéreos;  
466 1996. Director General of Civil Aeronautics, Dominican Republic.
- 467 20. Bureau of Meteorology. Climate data: Bureau of Meteorology, Canberra.  
468 Available from <http://www.bom.gov.au/climate/data/>.
- 469 21. Oliveira Nascimento AL, Garófalo CA. Trap-nesting solitary wasps  
470 (Hymenoptera: Aculeata) in an insular landscape: Mortality rates for  
471 immature wasps, parasitism, and sex ratios. *Sociobiology*. 2014; 61: 207-  
472 17.
- 473 22. Wilke R., Bazilio S. & Homczinski I. 2013. Diversidade, sazonalidade e  
474 aspectos biológicos de vespas solitárias em ninhos armadilhas na região  
475 de São Miguel da Serra, Porto União – SC. (Diversity, seasonality and  
476 biological aspects of solitary wasps in nest traps in the region of Sao  
477 Miguel da Serra, Porto Uniao). In: Krupek, RA (ed.) *Teaching & Research*  
478 No. 11, Vol. 1, University of Paraná, Brazil.
- 479 23. Jayasingh DB, Taffe CA. The biology of the eumenid mud-wasp  
480 *Pachodynerus nasidens* in trapnests. *Ecol Entomol*. 1982; 27: 283-89.



- 481 24. Silva JF. Vespas solitárias (Hymenoptera: Aculeata) nidificando em  
482 ninhos-armadilha na Estação Ecológica de Ribeirão Preto, SP (Solitary  
483 wasps (Hymenoptera: Aculeata) nesting in trap nests at the Ecological  
484 Station of Ribeirão Preto, SP) [MSc thesis]. Faculty of Philosophy,  
485 Sciences and Letters of Ribeirão Preto: University of São Paulo; 2008.
- 486 25. Buschini MLT. Life-history and sex allocation in *Trypoxylon* (syn.  
487 *Trypargilum*) *lactitarse* (Hymenoptera; Crabronidae). J Zool Syst Evol Res.  
488 2007; 45: 206-13.
- 489 26. Polidori C, Boesi R, Borsato W. Few, small, and male: Multiple effects of  
490 reduced nest space on the offspring of the solitary wasp, *Euodynerus*  
491 (*Pareuodynerus*) *posticus* (Hymenoptera: Vespidae). C R Biol. 2011; 334:  
492 50-60.
- 493 27. Fernandez-Triana JL, Gonzalez GG, Ferrer EP, Ruiz, AS. Ecological  
494 relationships in nests of six Cuban aculeate wasps (Hymenoptera:  
495 Vespidae, Sphecidae, Apidae). Bol SEA. 2005; 36 115-18.
- 496 28. Assis JMF, Camillo E. Diversidade, sazonalidade e aspectos biológicos de  
497 vespas solitárias (Hymenoptera: Sphecidae: Vespidae) em ninhos  
498 armadilhas na região de Ituiutaba, MG (Diversity, seasonality and nesting  
499 biology of solitary wasps (Hymenoptera: Sphecidae: Vespidae) in trap-  
500 nests in the Ituiutaba region, MG). An Soc Entomol Bras. 1997; 26: 335-  
501 47.
- 502 29. Emond J-P, Mercier F, Nunes MCN. In-flight temperature conditions in the  
503 holds of a widebody aircraft. Paper 281, 20<sup>th</sup> International Congress of  
504 Refrigeration; 1999. International Institute of Refrigeration, Sydney.

505           30. Perry G. Wheel-well and cargo compartment temperatures of large aircraft  
506           in flight: implications for stowaways. *Aviat Space Environ Med.* 2002; 73:  
507           673-76.

508

509

510 **Figure Legends**

511

512 Figure 1. Location of pitot probe panels at Brisbane Airport.

513 Figure 2. Pitot panels installed on gate light pole at Domestic Terminal (left) and on  
514 aerobridge at International Terminal (right).

515 Figure 3. Pitot probe blockages by mud-nesting wasps and rainfall at Brisbane  
516 Airport, February 2016 – April 2019.

517 Figure 4. Relationship between pitot probe blockages and minimum distance to (a)  
518 natural horizontal habitat and (b) natural vertical habitat.

519 Figure 5. Mean number of days (from collection of probes) to emergence of live  
520 wasps, February 2016 – April 2019.

521 Figure 6. Relationship between pitot probe volume and sex of emerging live adult  
522 wasps. Second order polynomial line of best fit fitted.  $r^2_{\text{male}} = 0.942$  ( $p < 0.05$ ),  $r^2_{\text{female}}$   
523  $= 0.517$  (ns).

524

525 **Figures**

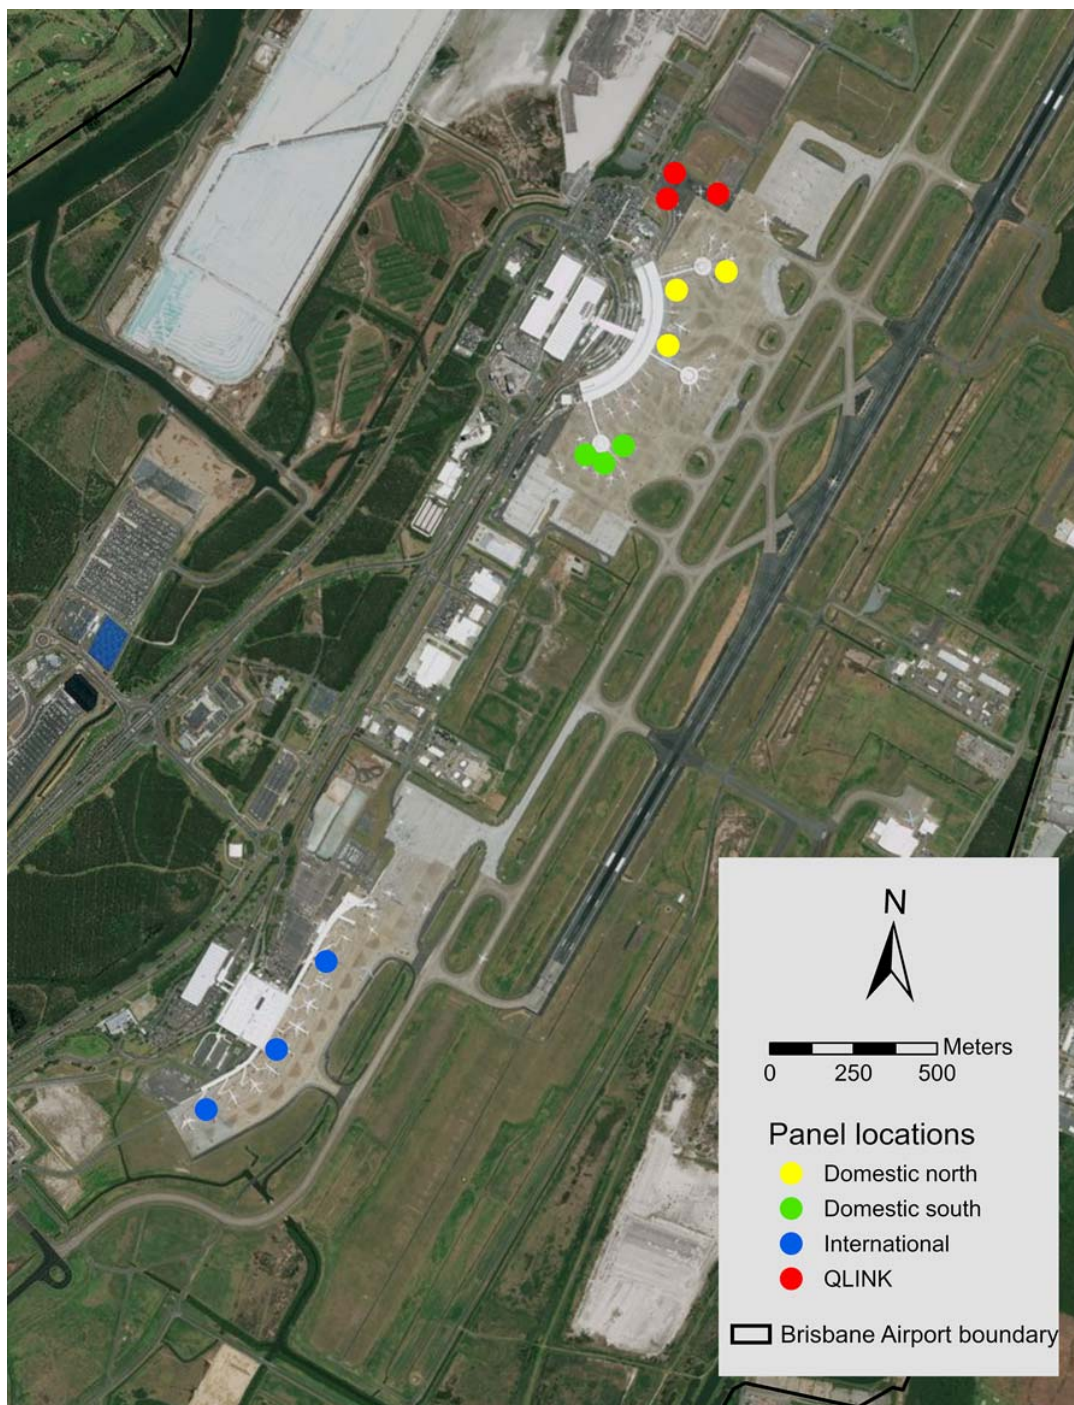

526

527 **Figure 1**

528

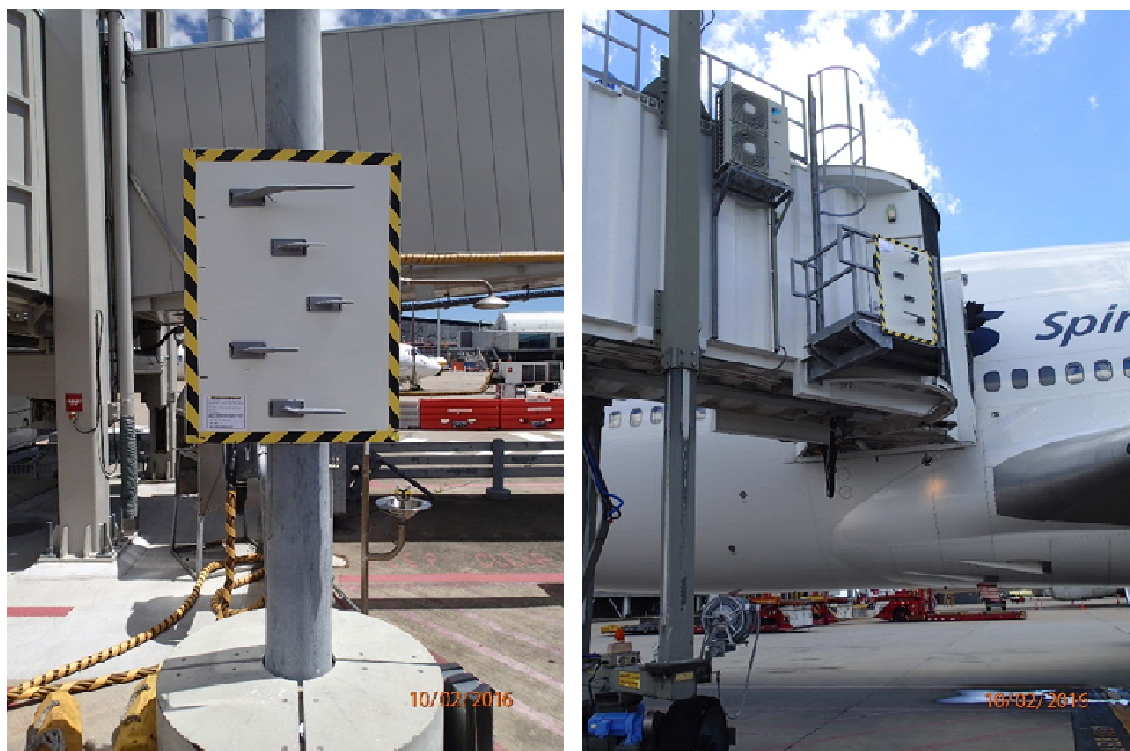

529

530 Figure 2

531

532

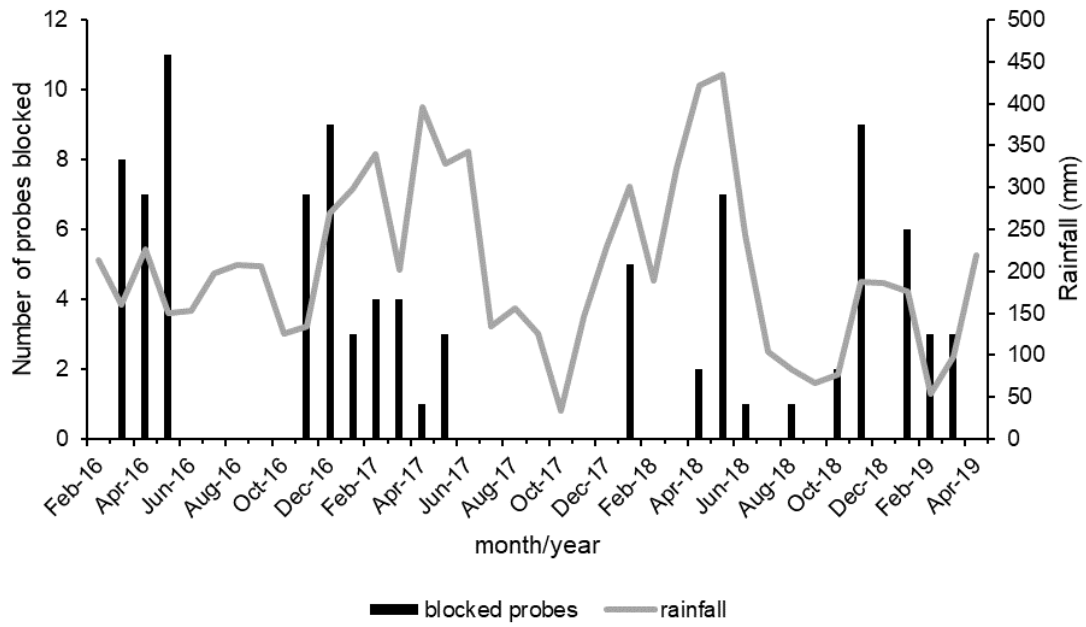

533

534 Figure 3

535

536

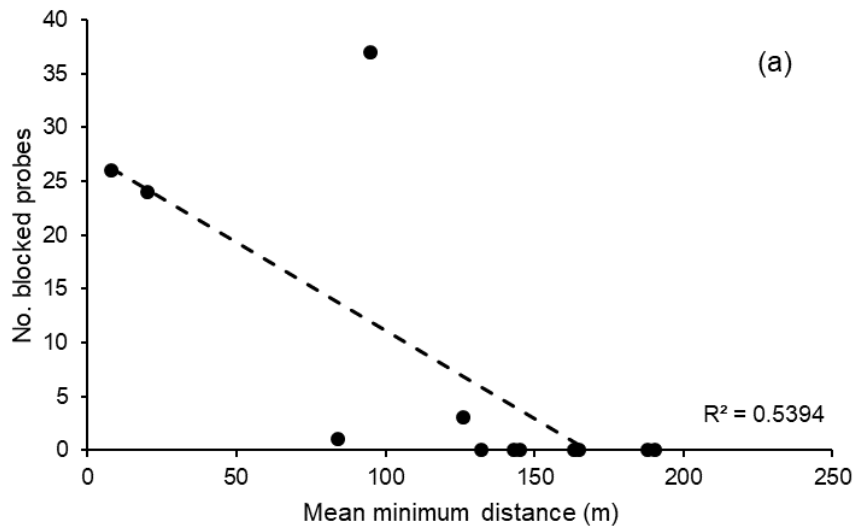

537

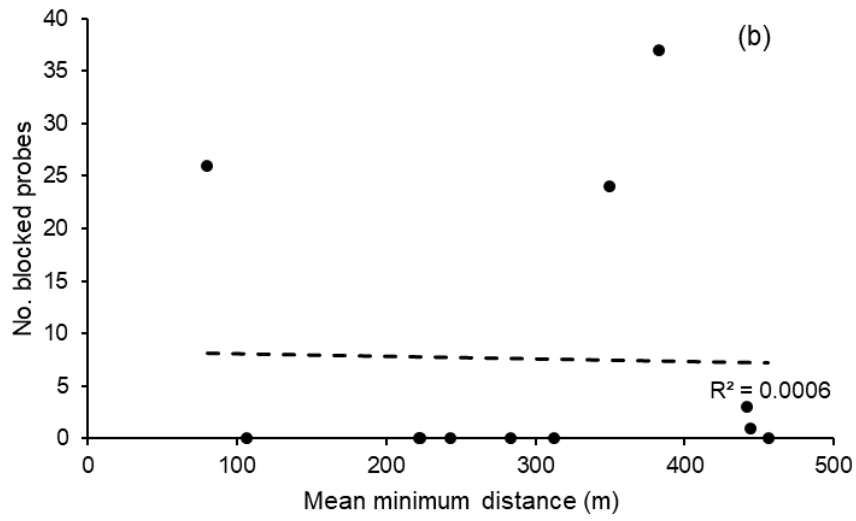

538

539 Figure 4

540

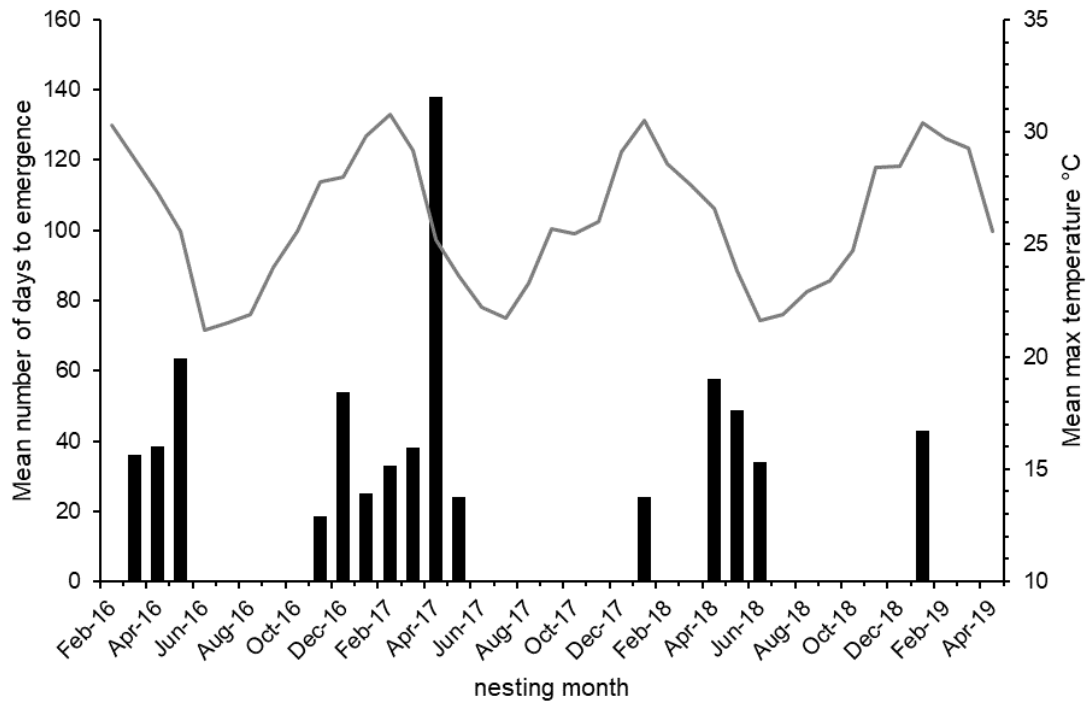

541  
542 Figure 5

543



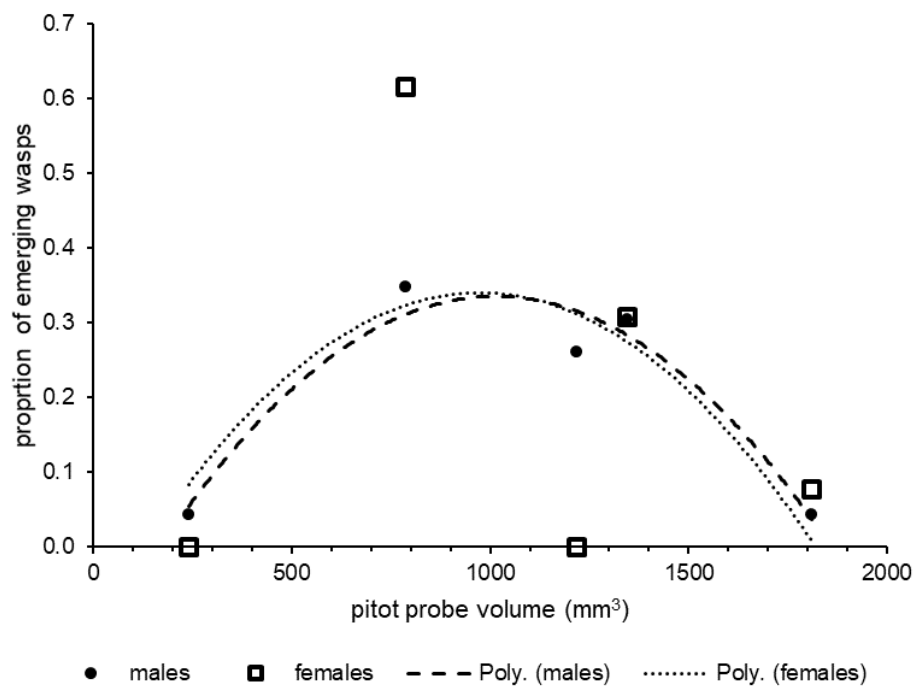

544

545

546 Figure 6

547

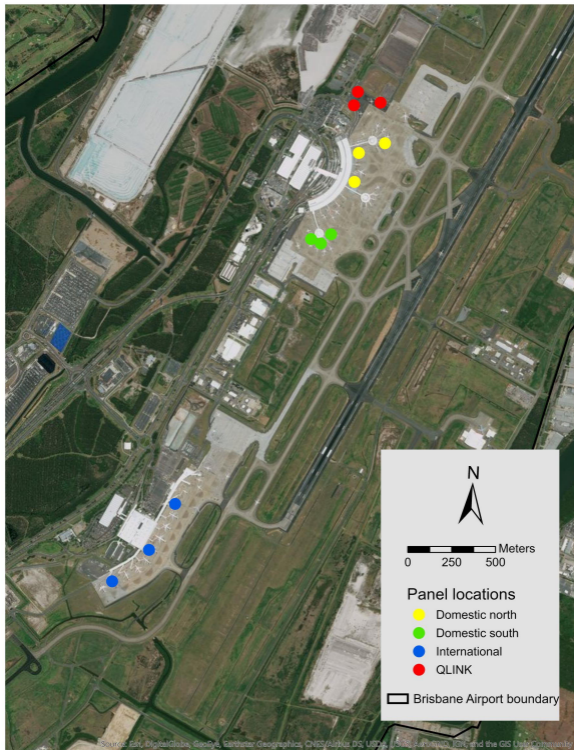

Source: Esri, DigitalGlobe, GeoEye, Earthstar Geographics, CNES/Airbus DS, USDA, AeroGRID, IGN, and the GIS User Community

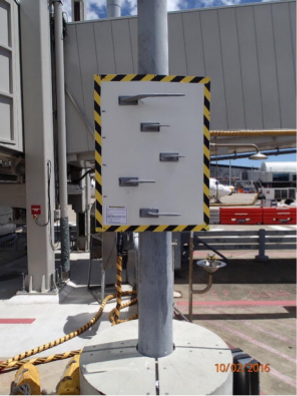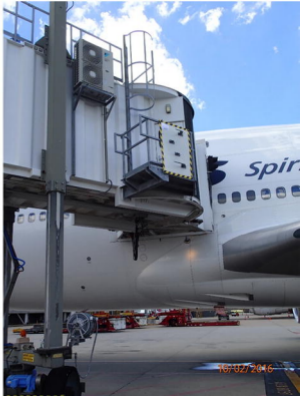

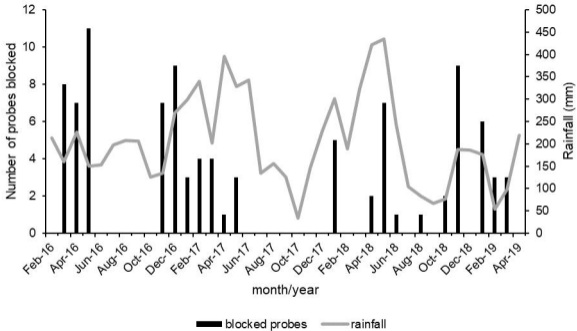

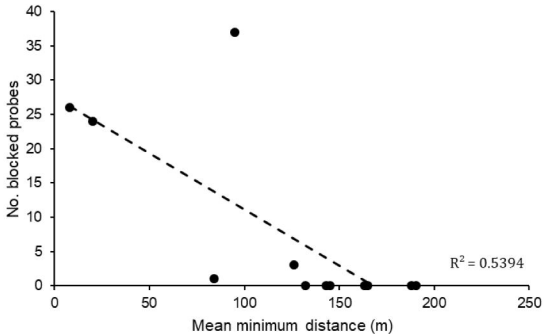

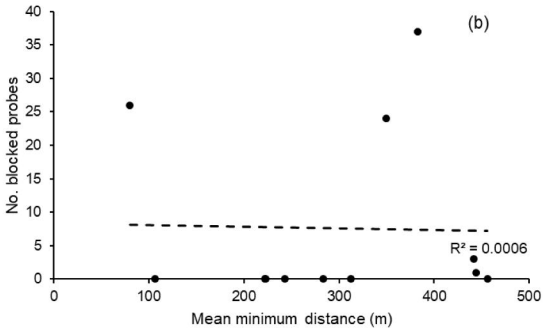

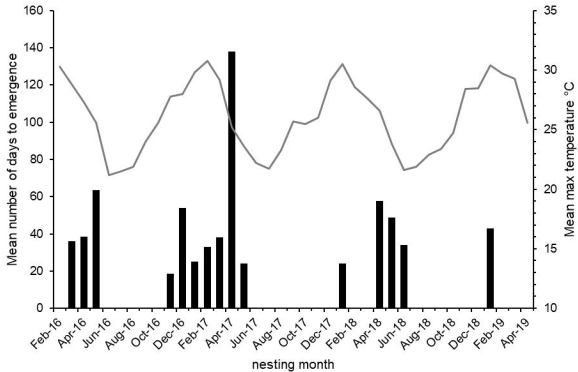

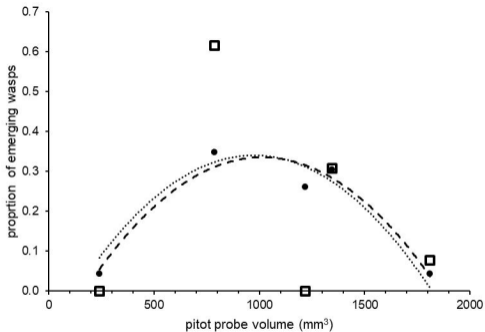

● males    □ females    - - - Poly. (males)    ..... Poly. (females)
